# Supplementary material for: Effect of Trait Heritability, Training Population Size and Marker Density on Genomic Prediction Accuracy Estimation in 22 bi-parental Tropical Maize Populations
Source: Front Plant Sci. 2017 Nov 8;8:1916. doi: 10.3389/fpls.2017.01916 (PMC5683035; doi:10.3389/fpls.2017.01916)
Supplement: Supplementary file 1 [file Table1.XLSX]

## Sheet: Sheet1
Table S1 Heritability (h2) of all the trait-environment combinations in all the populations
	Population	Heritability
		GY_WW	GY_WS	AD_WW	AD_WS	PH_WW	PH_WS
	1	0.37	0.24	0.55	0.34	0.74	0.01
	2	0.18	0.26	0.24	0	0.32	0
	3	0.57	0.23	0.72	0.39	0.65	0.12
	4	0.47	0.01	0.62	0.5	0.64	0.13
	5	0.52	0	0.33	0.26	0.56	0.45
	6	0.43	0.02	0.62	0.8	0.58	0.53
	7	0.55	0.33	0.61	0.39	0.61	0.23
	8	0.58	0.22	0.77	0.59	0.76	0.22
	9	0.38	0.16	0.56	0.06	0.75	0.33
	10	0.4	0.17	0.46	0.5	0.74	0.12
	11	0.49	0.24	0.66	0.11	0.67	0.64
	12	0.48	0.27	0.68	0.18	0.62	0.48
	13	0.16	0.4	0.61	0	0.61	0.19
	14	0.51	0.11	0.71	0.52	0.87	0.66
	15	0.13	0.32	0.76	0.69	0.9	0.79
	16	0.36	0.36	0.72	0.6	0.77	0.42
	17	0.55	0.51	0.59	0.56	0.2	0.41
	18	0.45	0.31	0.6	0.68	0.55	0.52
	19	0.3	0.46	0.38	0.68	0.5	0.41
	20	0.11	0.31	0.25	0.46	0.26	0.41
	21	0.35	0.49	0.3	0.6	0.22	0.38
	22	0.07	0.28	0.42	0.56	0.35	0.39
	Average	0.38	0.27	0.55	0.47	0.59	0.37
