# Supplementary material for: Effect of Trait Heritability, Training Population Size and Marker Density on Genomic Prediction Accuracy Estimation in 22 bi-parental Tropical Maize Populations
Source: Front Plant Sci. 2017 Nov 8;8:1916. doi: 10.3389/fpls.2017.01916 (PMC5683035; doi:10.3389/fpls.2017.01916)
Supplement: Supplementary file 2 [file Table2.XLSX]

## Sheet: Sheet1
Table S2 rMG mean of all the trait-environment combinations under all the possible combinations between training population size (TPS) and marker density (MD), four levels of TPS (30, 50, 70 and 90) and three levels of MD (50 SNPs, 100 SNPs and All SNPs) were used for prediction.
TPS	MD	GY_WW	AD_WW	PH_WW	GY_WS	AD_WS	PH_WS
90	All	0.33	0.34	0.38	0.18	0.28	0.25
90	100	0.29	0.31	0.34	0.15	0.26	0.23
90	50	0.24	0.24	0.27	0.11	0.23	0.18
70	All	0.31	0.32	0.36	0.16	0.26	0.24
70	100	0.27	0.28	0.32	0.13	0.24	0.22
70	50	0.21	0.22	0.26	0.1	0.21	0.17
50	All	0.28	0.29	0.32	0.14	0.23	0.22
50	100	0.24	0.26	0.29	0.11	0.22	0.2
50	50	0.19	0.19	0.23	0.09	0.19	0.16
30	All	0.24	0.24	0.27	0.11	0.19	0.18
30	100	0.2	0.21	0.24	0.09	0.18	0.17
30	50	0.16	0.16	0.19	0.07	0.16	0.14
