# Supplementary material for: Effect of Trait Heritability, Training Population Size and Marker Density on Genomic Prediction Accuracy Estimation in 22 bi-parental Tropical Maize Populations
Source: Front Plant Sci. 2017 Nov 8;8:1916. doi: 10.3389/fpls.2017.01916 (PMC5683035; doi:10.3389/fpls.2017.01916)
Supplement: Supplementary file 3 [file Table3.XLSX]

## Sheet: Sheet1
Table S3 Summary information of rMG values of predictions between the pairwise half-sib populations
Number of pairwise half-sib populations	Training Population	Prediction Population	Number of Markers	GY_WW	GY_WS	AD_WW	AD_WS	PH_WW	PH_WS
1	1	2	61	-0.0377074	0.00544422	-0.053809	-0.0704401	-0.120873	0.0271724
2	1	3	67	-0.0301865	0.141657	-0.136841	-0.029219	-0.108784	0.0106405
3	1	4	78	-0.0101401	0.00558581	-0.00125753	0.092088	-0.138292	-0.0921727
4	1	5	110	-0.109205	0.0152398	-0.0911551	0.0225331	-0.0735662	0.006472
5	2	1	61	-0.274688	0.0154435	-0.230602	-0.109742	-0.0392384	0.0907933
6	2	3	51	0.0309261	-0.150173	0.144749	0.0253289	0.10508	0.0180418
7	2	4	58	0.0105025	0.0052994	0.00158355	0.0923421	0.138665	-0.0919871
8	3	1	67	-0.274978	0.0155017	-0.230932	-0.109849	-0.0401144	0.0908286
9	3	2	51	0.0394135	-0.00244418	0.0621397	0.070624	0.123874	0.0347369
10	3	4	63	-0.0992407	0.0132058	0.0399575	0.0792416	0.0342035	-0.0159081
11	3	5	68	0.0696244	0.0749313	-0.0189513	0.105183	-0.0231775	0.00299069
12	4	1	78	-0.211987	0.0620221	-0.202747	0.0590281	-0.11251	-0.00250982
13	4	2	58	0.204797	0.148967	0.0647647	0.0275502	0.108341	-0.00601074
14	4	3	63	-0.062641	0.0328961	0.00747953	0.0521619	0.0189687	-0.0379723
15	5	1	110	-0.0330398	0.101502	-0.133897	0.126929	-0.0773787	0.13059
16	5	3	68	0.0619509	0.0319334	-0.00825576	0.0519054	-0.0194707	0.0380169
17	6	8	94	-0.0127336	0.0250502	-0.0575938	-0.0278833	0.0236057	-0.0858371
18	7	8	75	-0.0770584	0.0569089	-0.00947174	0.0645598	-0.0165474	0.0616379
19	8	6	94	-0.113648	0.0088347	-0.02039	-0.0258103	0.0544902	-0.0490728
20	8	7	75	-0.0313374	0.145187	-0.0376289	0.0208745	-0.136909	0.0767116
21	11	12	48	0.0139676	0.0852683	-0.0313817	-0.0103076	0.0614112	-0.0182122
22	11	14	44	-0.0371393	-0.0833649	-0.045949	0.135904	-0.00867841	-0.121732
23	12	11	48	0.139912	0.0664101	-0.252586	-0.102348	0.0921175	-0.197995
24	12	13	77	-0.0130553	0.045755	0.0598152	0.0398718	-0.0599108	-0.134111
25	13	12	77	-0.0738167	0.0579614	0.0549361	0.042348	-0.0890635	-0.0252305
26	14	11	44	-0.188351	-0.010377	-0.17066	0.0621795	-0.129636	-0.115791
27	15	16	45	0.115884	0.0893266	-0.0170555	-0.101942	0.0776736	-0.0190451
28	16	15	45	0.0311512	0.0460335	-0.0618213	-0.0338833	0.046853	-0.0452375
29	17	18	100	0.316845	-0.252527	-0.117124	0.295038	-0.275985	0.0916902
30	17	19	84	-0.166568	-0.0252332	-0.00944796	-0.031483	0.0159745	0.139392
31	18	17	100	0.108457	-0.00100981	-0.0171807	0.0341047	-0.146539	0.0140473
32	18	19	89	-0.16152	0.0292308	0.0090383	-0.0388492	-0.00807837	0.138651
33	19	17	84	-0.0276303	-0.00781911	-0.0107317	-0.0202667	0.176048	0.0234642
34	19	18	89	-0.317316	0.247041	0.115811	-0.295211	-0.271976	0.088316
		Average	71.2941	-0.0358987	0.0305791	-0.0413881	0.0144871	-0.0241006	0.000746092
		Minimum	44	-0.317316	-0.252527	-0.252586	-0.295211	-0.275985	-0.197995
		Maximum	110	0.316845	0.247041	0.144749	0.295038	0.176048	0.139392
